# Supplementary material
Source: publisher figshare collection journal article supplement (https://tandf.figshare.com/ndownloader/files/40217516)
Supplement: Supplementary file 1 [file 40217516]

Journal of Vertebrate Paleontology

Supplementary Data 1

The oldest articulated ranid from Europe: A *Pelophylax* specimenfrom the earliest Oligocene of Chartres-de -Bretagne (NW France)

ALFRED LEMIERRE,*.1 DAMIEN GENDRY,2 MARIE-MARGAUX POIRIER,2 VALENTIN GILLET,2 andROMAIN VULLO2

1Centre de Recherche en Paléontologie (CR2P) Paris, UMR 7207 CNRS-Muséum National d’Histoire Naturelle-Sorbonne Université, CP38, 8 rue Buffon, 75005 Paris, France, alfred.lemierre@outlook.com;

2Université Rennes, Géosciences, UMR CNRS 6118, Campus de Beaulieu, 263 avenue du Général Leclerc, 35042 Rennes, France, mariemargaux.poirier@orange.fr, valentin.gillet.37@gmail.com, romain.vullo@univ-rennes.fr, damien.gendry@univ-rennes.fr


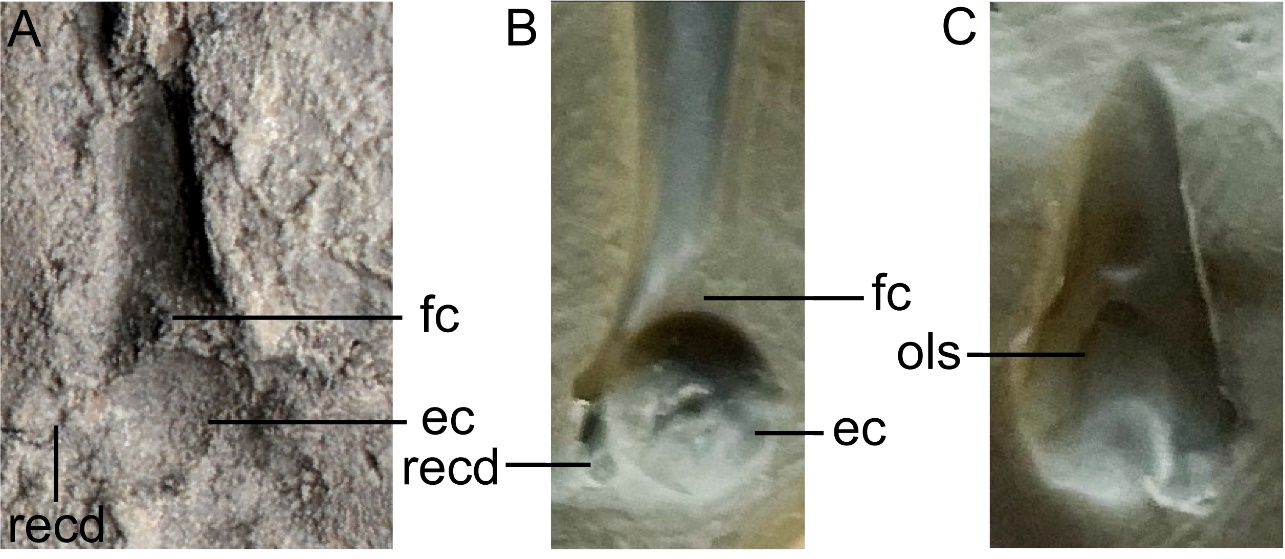


**FIGURE S1**. Comparison between the imprint of the humerus of IGR 144547 and the humerus of *Pelophylax* kl. *esculentus*. **A**, imprint of a humerus of IGR 144547 on M1, **B**, imprint of a humerus of *P.* kl. *esculentus* in ventral view and **C**, imprint of the same humerus in dorsal view. Abbreviations: **ec**, eminetia capitate; **fc**, fossa cubitalis; **ols**, oleocranon scar; **recd**, epicondylus radialis.
